# Supplementary material for: Assisted Reproductive Technology in China: Results Generated From Data Reporting System by CSRM From 2013 to 2016
Source: Front Endocrinol (Lausanne). 2020 Sep 17;11:458. doi: 10.3389/fendo.2020.00458 (PMC7527788; doi:10.3389/fendo.2020.00458)
Supplement: Supplementary file 1 [file Data_Sheet_1.xlsx]

## Sheet: Sheet1
List of Hospitals
First Affiliated Hospital Of Zhengzhou University
Chongqing Health Center for Women and Children
Drum Tower Hospital of Nanjing University
Zhengzhou Longhai Hospital
Zhengzhou Maternal and Child Health Hospital
The first affiliated Hospital of Guangxi Medical University
Affiliated Hospital of Guilin Medical College
Nanxishan Hospital of Guangxi Zhuang Autonomous region
Enshi State Central Hospital
The first affiliated Hospital of Hainan Medical College
Huangshi Central Hospital
Hangzhou first people's Hospital Qianjiang New City Hospital
Luoshan County people's Hospital
Xiangyang Central Hospital
Nanyang City Central Hospital
Shangrao City Maternal and Child Health Hospital
Nanchang City Medical Institute affiliated Hospital
Wuzhou Workers Hospital
Tibet Fukang Hospital
Wenzhou Maternal and Child Health Hospital
Quanzhou Maternal and Child Health Hospital
Foshan Maternal and Child Health Hospital
Tianjin United Family Hospital
Xinxiang Maternal and Child Health Hospital
Chengde City Central Hospital
Pingxiang City Maternal and Child Health Hospital of Jiangxi Province
Guangxi Guigang City people's Hospital
Shenyang Oriental Jinghua Hospital
Jiangxi Province Maternal and Child Health Hospital
Hunan Xiangtan Maternal and Child Health Hospital
Southern Medical University Southern Hospital
Shanghai Jiaotong University affiliated Renji Hospital
Yellow River Sanmenxia Hospital
Yulin City Maternal and Child Health Hospital
Wenzhou Medical University affiliated second Hospital
Zhengzhou University third affiliated Hospital
Henan Xinhe Hospital
Nanyang first people's Hospital
Shengjing Hospital affiliated to China Medical University
Sixth Hospital affiliated to Sun Yat-sen University
People's Liberation Army 181 Hospital
Luoyang Central Hospital affiliated to Zhengzhou University
Xiamen Maternal and Child Health Hospital
Liuzhou people's Hospital
Xi'an fourth Hospital
Qinghai Provincial people's Hospital
Henan University of traditional Chinese Medicine third affiliated Hospital
Xiangya Hospital
Liaocheng second people's Hospital
Northwest Women's and Children's Hospital
Henan Family Planning Science and Technology Research Institute
Chongqing Maternal and Child Health Hospital
Ganzhou City people's Hospital
Luohe Central Hospital
Luoyang Women and Children's Hospital
Kaifeng City Maternal and Child Health Hospital
Anyang City Maternal and Child Health Hospital
Shanxi Province Maternal and Child Health Hospital
Jiaozuo Maternal and Child Health Hospital
Tianjin first Central Hospital
Pingdingshan Maternal and Child Health Hospital
Nanchang healthy Reproductive Hospital
Henan University of traditional Chinese Medicine first affiliated Hospital
Kaifeng City Medical Science Institute Hospital
Xinxiang Medical College third affiliated Hospital
Shao Yifu Hospital
Ningbo Women and Children Hospital
Puyang Maternal and Child Insurance
Kunming Angel Obstetrics and Gynecology Hospital
Xinxiang City Central Hospital
Dalian Women and Children Medical Center
Luoyang Infertility Hospital
Henan people's Hospital
Zhengzhou University second affiliated Hospital
Xinjiang Medical University first affiliated Hospital
China Medical University affiliated Reproductive Hospital
Weifang Medical College affiliated Hospital
Xinjiang Jiayin Hospital
Shenyang Kyushu Jiayuan Hospital
Beijing Maternal and Child Health Hospital
Guiyang Maternal and Child Health Hospital
Guangdong Maternal and Child Health Hospital
Wuhan Tongji Hospital
Northern Theater General Hospital
Yiji Mountain Hospital of Southern Anhui Medical College
Binzhou Medical College affiliated Hospital
Zhongshan City Boai Hospital
Changzhou Maternal and Child Health Hospital
Beijing Union Hospital
Huaian City Maternal and Child Health Hospital
Huaian City first people's Hospital
Liaocheng people's Hospital
Xuzhou City Center Hospital
Guangzhou Women and Children Medical Center
Shenyang Maternal and Child Hospital
Inner Mongolia Medical University Hospital
Affiliated Hospital of Shandong University of traditional Chinese Medicine
Nantong University affiliated Hospital
Dongguan Kanghua Hospital
Hebei Medical University second Hospital
Jiangsu traditional Chinese Medicine Hospital
Qingyuan people's Hospital
Hainan Medical College second affiliated Hospital
Guangdong Provincial Family Planning
Xingtai Infertility specialist Hospital
Zhongshan University first affiliated Hospital
Guangxi Zhuang Zu District Maternal and Child Health Hospital
Zhenjiang City fourth people's Hospital
Huazhong University of Science and Technology affiliated Union Hospital
Qingdao University affiliated Hospital
Guangxi Zhuang Autonomous region people's Hospital
Huizhou Maternal and Child Health Hospital
Shaoyang Huien Reproductive Health Hospital
Linyi Women and Children Hospital
Ningxia Medical University General Hospital
Yueyang first people's Hospital
National Health and Family Planning Commission outpatient Department of Science and Technology
Dezhou people's Hospital
Yuhuangding Hospital
First people's Hospital of JIning city
Maternal and Child Health Hospital of Shandong Province Zibo City
Sun Yat-sen Memorial Hospital of Sun Yat-sen University
Shenzhen Zhongshan Urology Hospital
Jiujiang City Maternal and Child Health Hospital
Wuxi City Maternal and Child Health Hospital
Shandong University Qilu Hospital
Nantong City Maternal and Child Health Hospital
Ninghai County Maternal and Child Health Hospital
Nanjing General Hospital
The 174th Hospital of the people's Liberation Army
people's Hospital of Hubei Province Shiyan people's Hospital
the first affiliated Hospital of Bengbu Medical College
Nanchang University second affiliated Hospital
Yueyang Maternal and Child Health Hospital
Xinyu City Maternal and Child Health Hospital
Huizhou Central people's Hospital
Chenzhou first people's Hospital Peking University
People's Hospital of Peking university
Fujian Maternal and Child Health Hospital
Yunnan first people's Hospital
the first affiliated Hospital of Suzhou University
the first affiliated Hospital of Wenzhou Medical University
the first affiliated Hospital of Zunyi Medical College
Meizhou people's Hospital
Meizhou Maternal and Child Planning Service Center (Meizhou Women and Children Hospital)
Liuzhou Workers Hospital
Anhui Maternal and Child Health Hospital
Peking University Shenzhen Hospital
Tangshan Maternal and Child Health Hospital
Maoming people's Medicine
Chengdu Women and Children Center Hospital
Guangdong traditional Chinese Medicine Hospital
University City Hospital Zhanjiang Jiuhe Hospital
Dali University first affiliated Hospital
Dongguan people's Hospital
Guangzhou Medical University third affiliated Hospital
Chengdu traditional Chinese Medicine University second affiliated Hospital
Southwest Medical University affiliated Hospital
Shenzhen Maternal and Child Health Hospital
Xi'an Jiaotong University first affiliated Hospital
Kunming Medical University second affiliated Hospital
Guangdong second people's Hospital
Tianjin Medical University General Hospital
Guangdong Medical University affiliated Hospital
Liuzhou Maternal and Child Health Hospital
Suzhou Municipal Hospital
people's Liberation Army 105 Hospital
Inner Mongolia Chifeng Reproductive Health Hospital
Xiamen University first Maternal and Child Health Hospital
Shanghai first Maternal and Child Health Hospital
Handan City Maternal and Child Health Hospital
Wuxi City people's Hospital
Taizhou people's Hospital
Jiangsu Province people's Hospital
Tianjin Central Obstetrics and Gynecology Hospital
Jiaxing Maternal and Child Health Hospital
people's Liberation Army Fu. State General Hospital
Chuxiong people's Hospital
Xiamen Anbao Hospital
Yunnan second people's Hospital
Air Force military Medical University Tangdu Hospital
Xinjiang Yili Prefecture Maternal and Child Health Hospital
Reproductive Center Sanming Integrated traditional Chinese and Western Medicine Hospital
San Lujia Maternal Hospital
Ganzhou Maternal and Child Health Hospital
Cangzhou Maternal and Child Health Hospital
Changde City first people's Hospital
Urumqi Maternal and Child Health Hospital
Quanzhou traditional Chinese Medicine Hospital
Putian College affiliated Hospital
Yinchuan Women Child Health Hospital
Chongqing Medical University first affiliated Hospital
Army military Medical University first affiliated Hospital
Nanjing Maternal and Child Health Hospital
Zhejiang University Medical College affiliated Obstetrics and Gynecology Hospital
Qinhuangdao first Hospital
Chengdu West Nan Gynecology Hospital
Hengshui Health School affiliated Hospital
Sichuan University second Hospital
Chengdu Jinjiang District Maternal and Child Health Hospital
Hebei Family Planning Science and Technology Research Institute
Beijing Century altar Hospital
Beijing Chaoyang Hospital affiliated to Medical University
Jinzhou Maternal and Infant Hospital Reproductive Branch
The first affiliated Hospital of Hebei Northern College
Qingdao Women's and Children's Hospital
Armed Police characteristic Medical Center (former affiliated Hospital of Armed Police Logistics College)
Affiliated Hospital of Jining Medical College Chengde
Maternal and Child Health Hospital of Chengde city
Handan City Central Hospital
Qinhuangdao City Maternal and Child Health Hospital
Cangzhou people's Hospital
Hengshui people's Hospital
Shijiazhuang City Obstetrics and Gynecology Hospital
Hebei Provincial people's Hospital
Lanzhou University first Hospital
Zhongshan people's Hospital
The first Hospital of Ji Lin University
The first people's Hospital of Foshan City
